# Supplementary material
Source: PubMed Central journal article supplement (PMC10962864)
Supplement: NIHMS1965188-supplement-new_supplementary_info.pdf [file NIHMS1965188-supplement-new_supplementary_info.pdf]

Supplementary Material for:

**The development of lexical competition in written- and spoken-word recognition**

Keith S. Apfelbaum, Claire Goodwin, Christina Blomquist and Bob McMurray

## Stimulus lists

Table A.1: Stimulus list 1

| Pair 1 type | Word 1 | Word 2 | Pair 2 type | Word 3 | Word 4 | # letters |
|-------------|--------|--------|-------------|--------|--------|-----------|
| Cohort      | rug    | run    | Rhyme       | dog    | fog    | 3         |
| Cohort      | sit    | sip    | Rhyme       | bed    | red    | 3         |
| Cohort      | raid   | rain   | Rhyme       | cool   | pool   | 4         |
| Cohort      | bead   | bean   | Rhyme       | hail   | nail   | 4         |
| Rhyme       | jet    | wet    | Frame       | leg    | log    | 3         |
| Rhyme       | van    | can    | Frame       | pet    | pot    | 3         |
| Rhyme       | feed   | seed   | Frame       | book   | beak   | 4         |
| Rhyme       | toad   | road   | Frame       | sail   | soil   | 4         |
| Frame       | bug    | beg    | Cohort      | cop    | cot    | 3         |
| Frame       | pan    | pen    | Cohort      | bat    | bag    | 3         |
| Frame       | boat   | bait   | Cohort      | leaf   | leak   | 4         |
| Frame       | hoop   | heap   | Cohort      | goat   | goal   | 4         |

Table A.2: Stimulus list 2

| Pair 1 type | Word 1 | Word 2 | Pair 2 type | Word 3 | Word 4 | # letters |
|-------------|--------|--------|-------------|--------|--------|-----------|
| Cohort      | sit    | sip    | Rhyme       | van    | can    | 3         |
| Cohort      | bat    | bag    | Rhyme       | jet    | wet    | 3         |
| Cohort      | goat   | goal   | Rhyme       | feed   | seed   | 4         |
| Cohort      | leaf   | leak   | Rhyme       | toad   | road   | 4         |
| Rhyme       | bed    | red    | Frame       | pet    | pot    | 3         |
| Rhyme       | dog    | fog    | Frame       | pan    | pen    | 3         |
| Rhyme       | cool   | pool   | Frame       | boat   | bait   | 4         |
| Rhyme       | hail   | nail   | Frame       | book   | beak   | 4         |
| Frame       | bug    | beg    | Cohort      | cop    | cot    | 3         |
| Frame       | leg    | log    | Cohort      | rug    | run    | 3         |
| Frame       | sail   | soil   | Cohort      | bead   | bean   | 4         |
| Frame       | hoop   | heap   | Cohort      | raid   | rain   | 4         |
